# Supplementary material
Source: PubMed Central journal article supplement (PMC5711386)
Supplement: en.2017-00660.sf1.pdf [file en.2017-00660.sf1.pdf]

Figure S1(Li et al.)

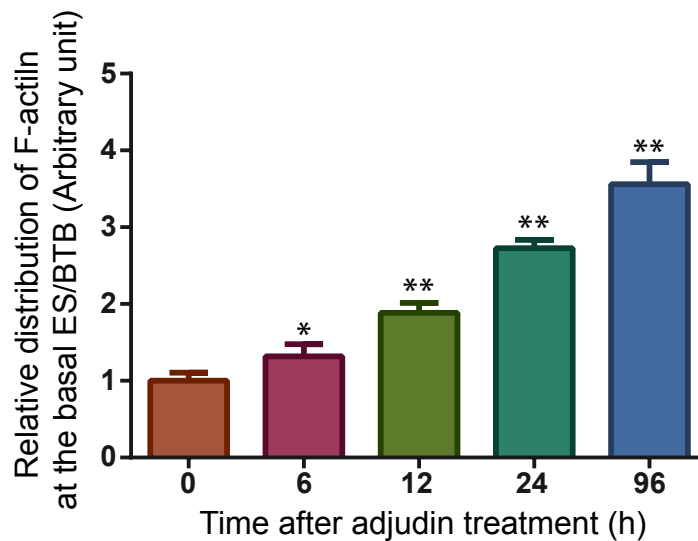

**Figure S1. Adjuvant treatment induces changes in the distribution of F-actin at the basal ES/BTB.**

This figure accompanies Figure 2 in the main text, providing additional information to Figure 2. In control testes at 0 h, F-actin near the base of the seminiferous tubule localized restrictively to the basal ES (see white bracket in Figure 2 which illustrates the relatively distribution of F-actin at the basal ES/BTB site). Basal ES together with the actin-based TJ and gap junction, as well as the intermediate filament-based desmosome, they constitute the BTB. The BTB site is annotated by the yellow arrowheads in Figure 2 (see main text), and located close to the base of the seminiferous tubule (annotated by the white dash line) However, following adjuvant treatment, even within 6 h, F-actin was found to become mis-localized, diffusing away from the basal ES/BTB site and no longer restrictively localized at the BTB as noted by the yellow brackets in Figure 2. Each bar is a mean $\pm$ SD of 5 independent experiments of  $n = 5$  rats. About 100 tubules were randomly selected and the relative distribution of F-actin at the basal ES/BTB was measured. Distribution of F-actin at the basal ES/BTB in the testis at time 0 (control) was arbitrarily set at 1. \*,  $P < 0.05$ ; \*\*,  $P < 0.01$  by ANOVA.

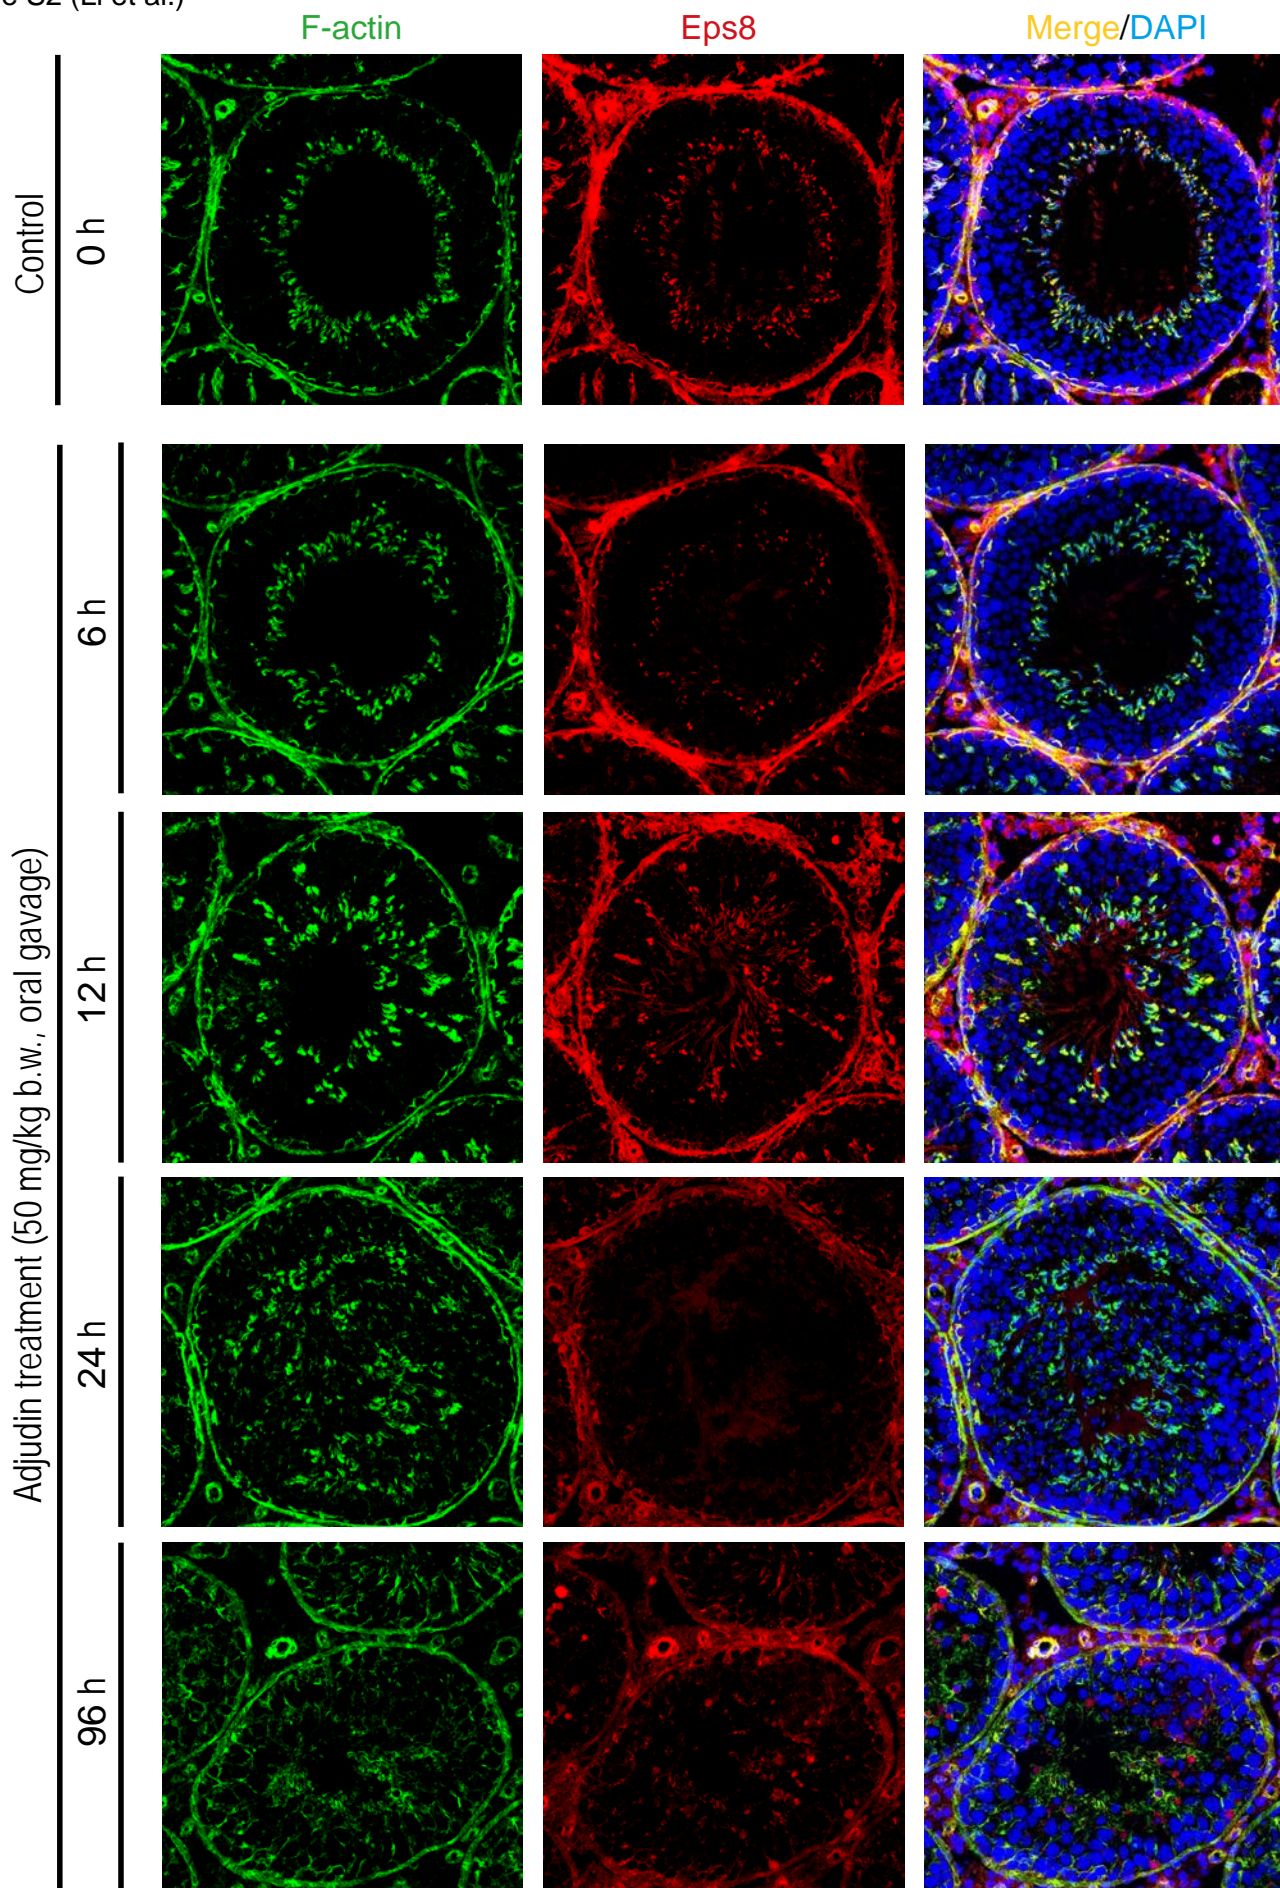

**Figure S2. Adjuvin treatment induces changes in the spatiotemporal expression of Eps8 and its co-localization with F-actin at the ES.** This figure accompanies Figure 3 in the main text, providing additional information to Figure 3.

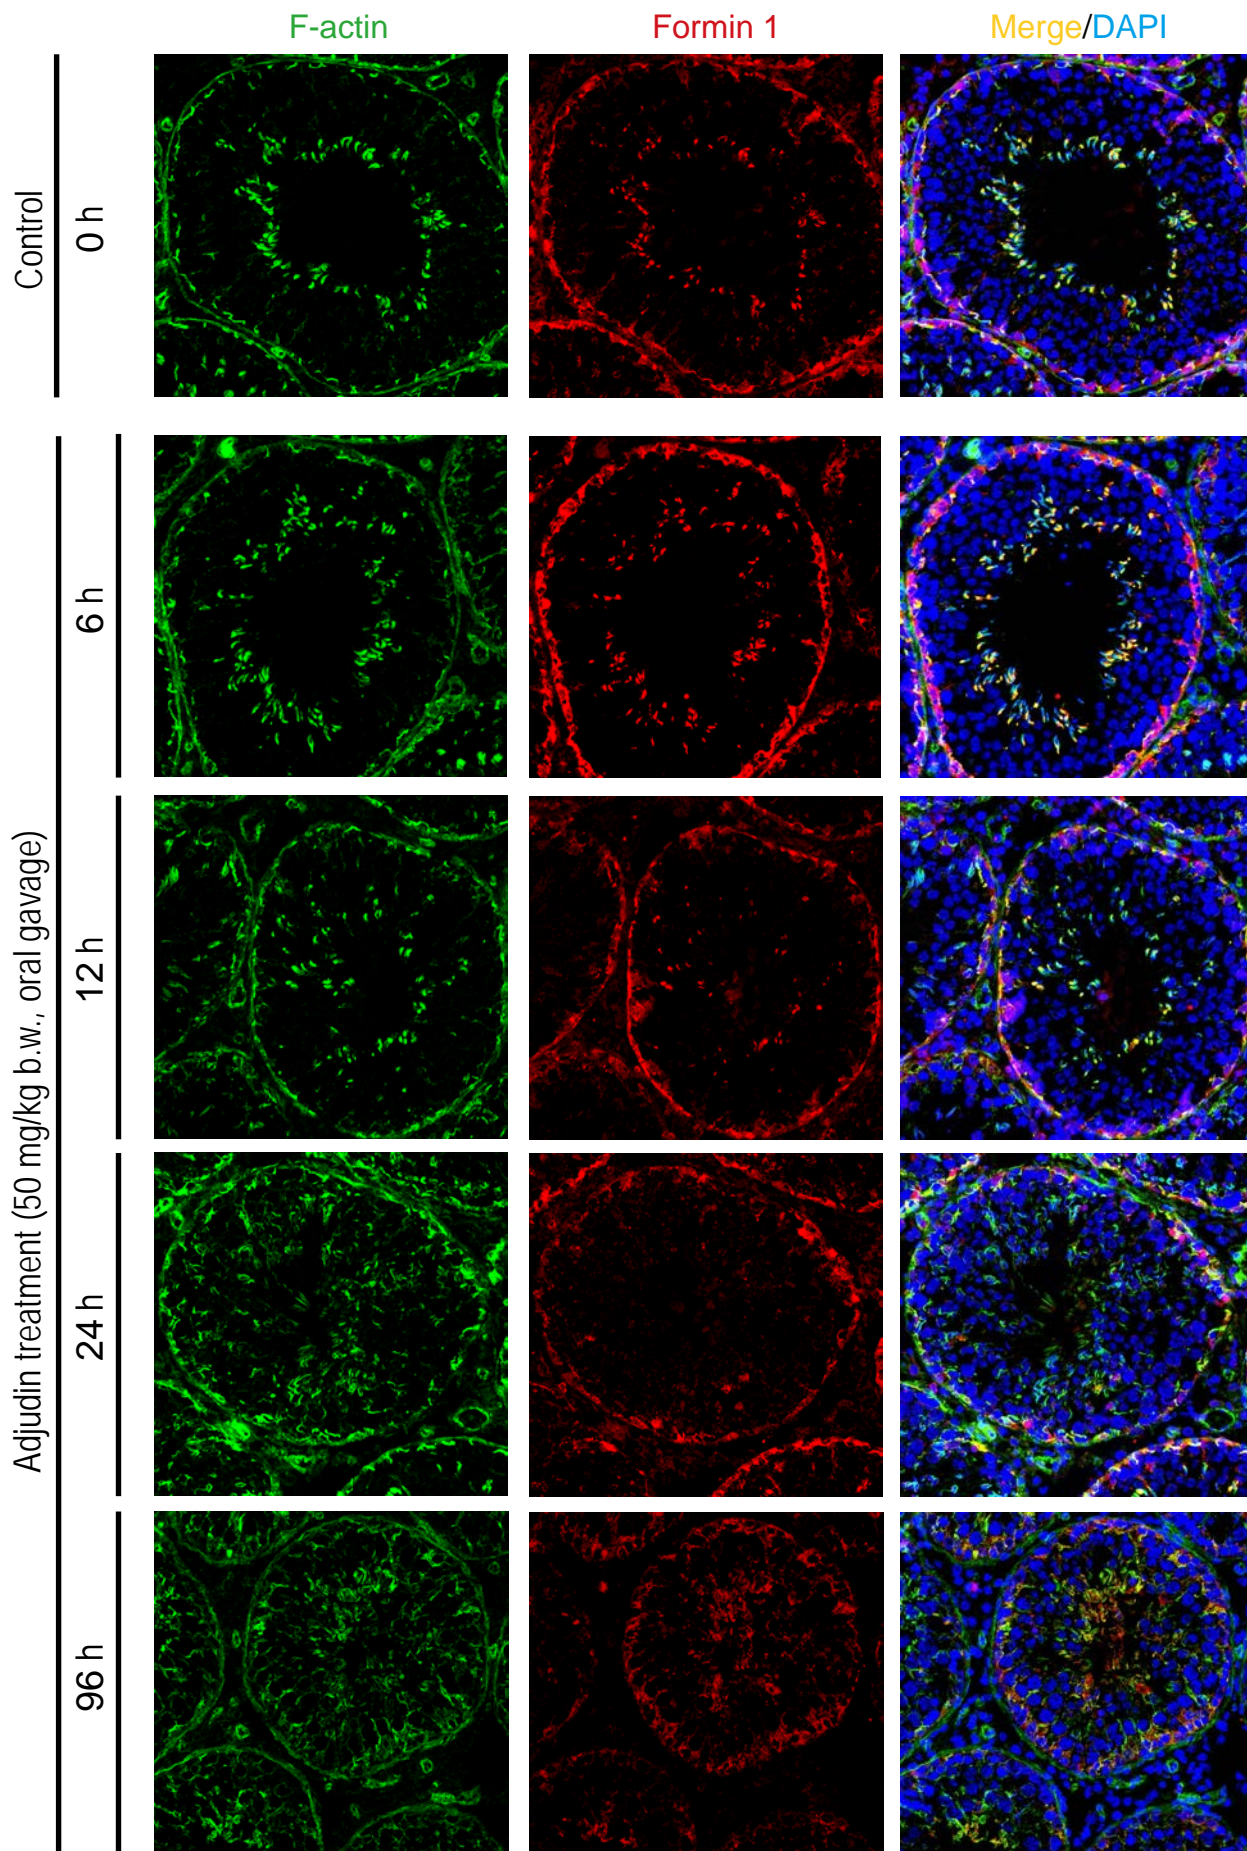

**Figure S3. Adjuvin treatment induces changes in the spatiotemporal expression of formin 1 and its co-localization with F-actin at the ES.** This figure accompanies Figure 4 in the main text, providing additional information to Figure 4.

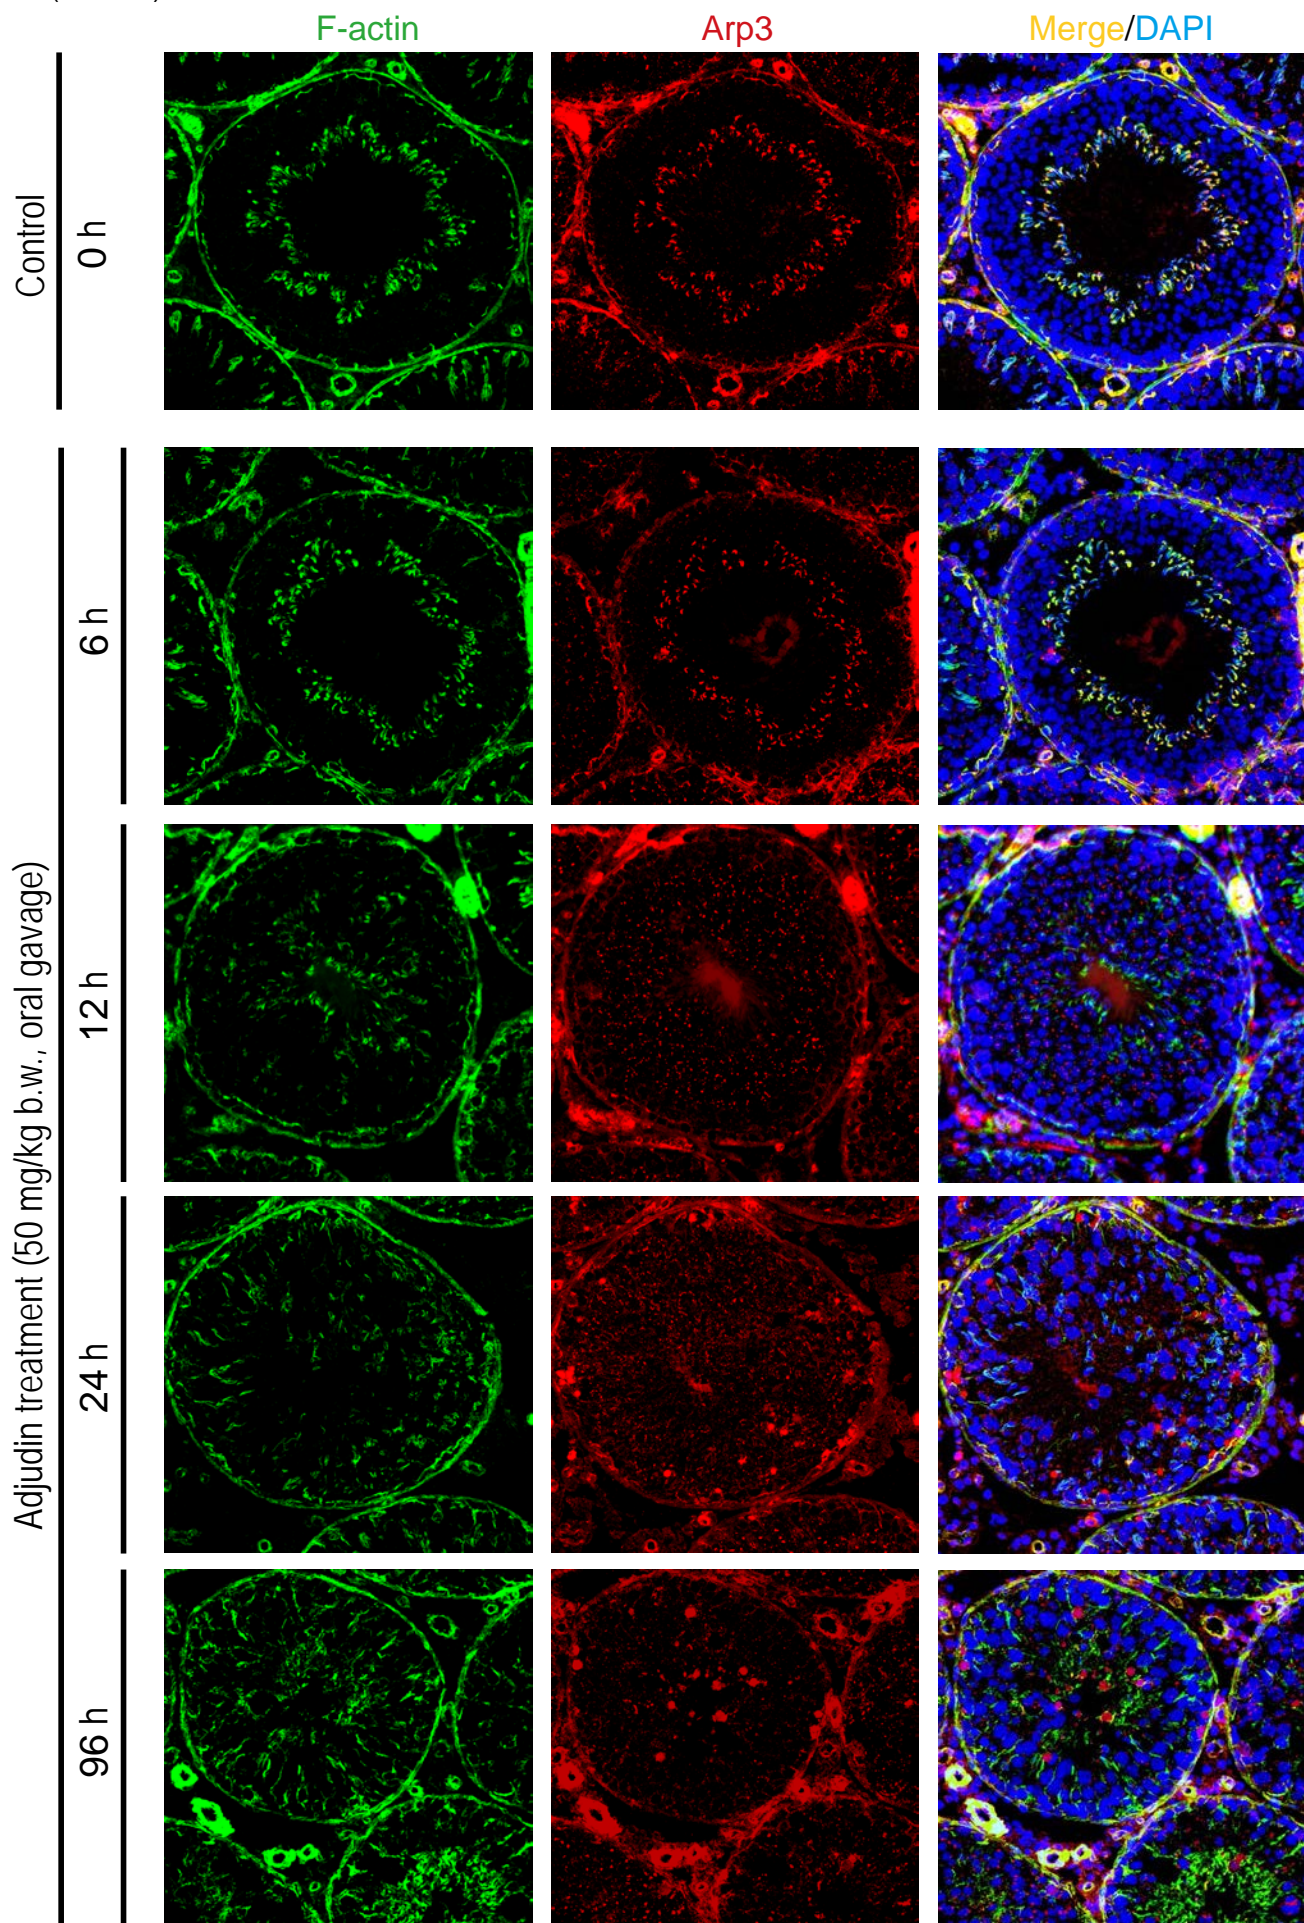

**Figure S4. Adjuvin treatment induces changes in the spatiotemporal expression of Arp3 and its co-localization with F-actin at the ES.** This figure accompanies Figure 5 in the main text, providing additional information to Figure 5.

Figure S5 (Li et al.)

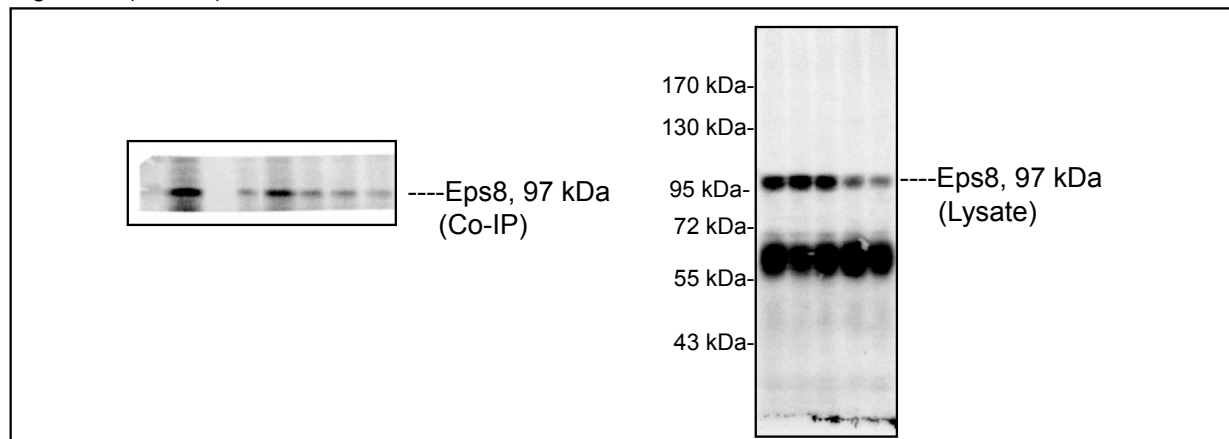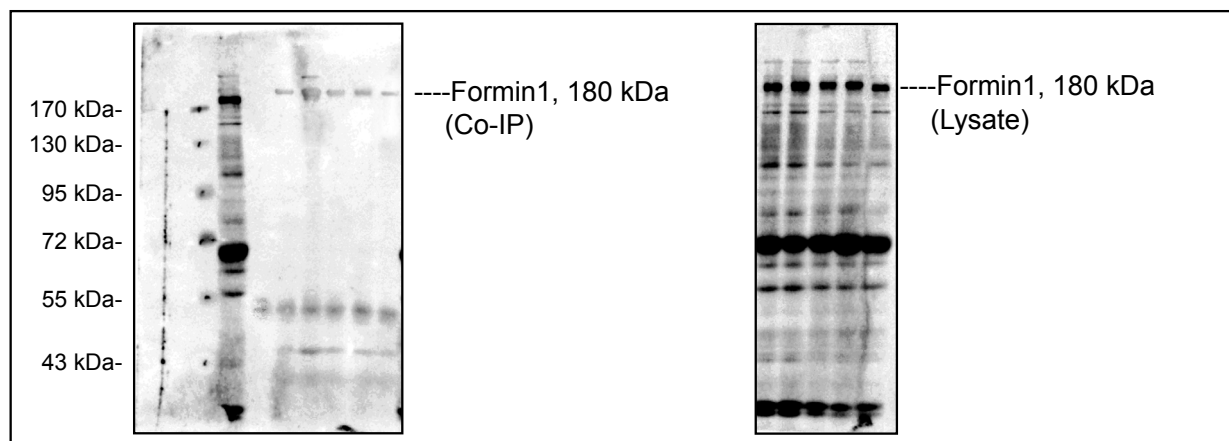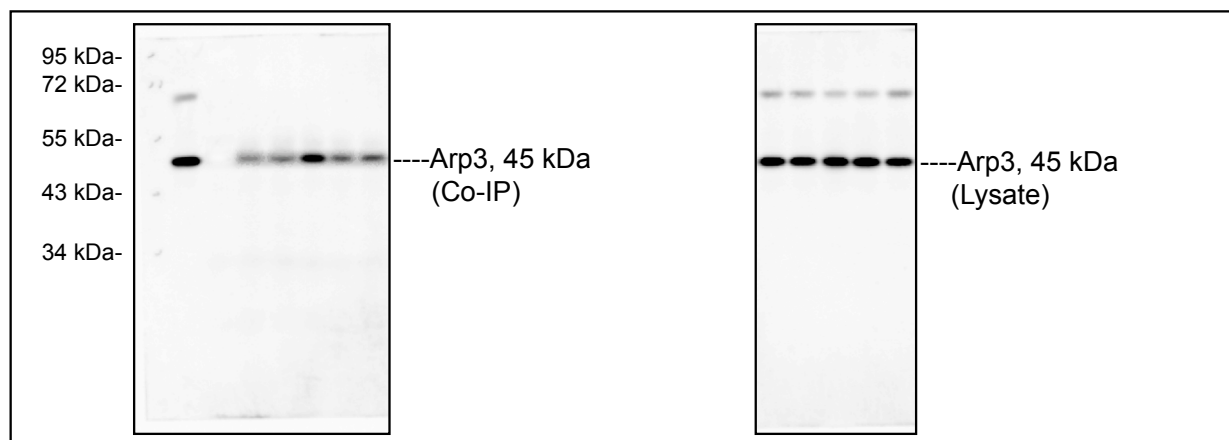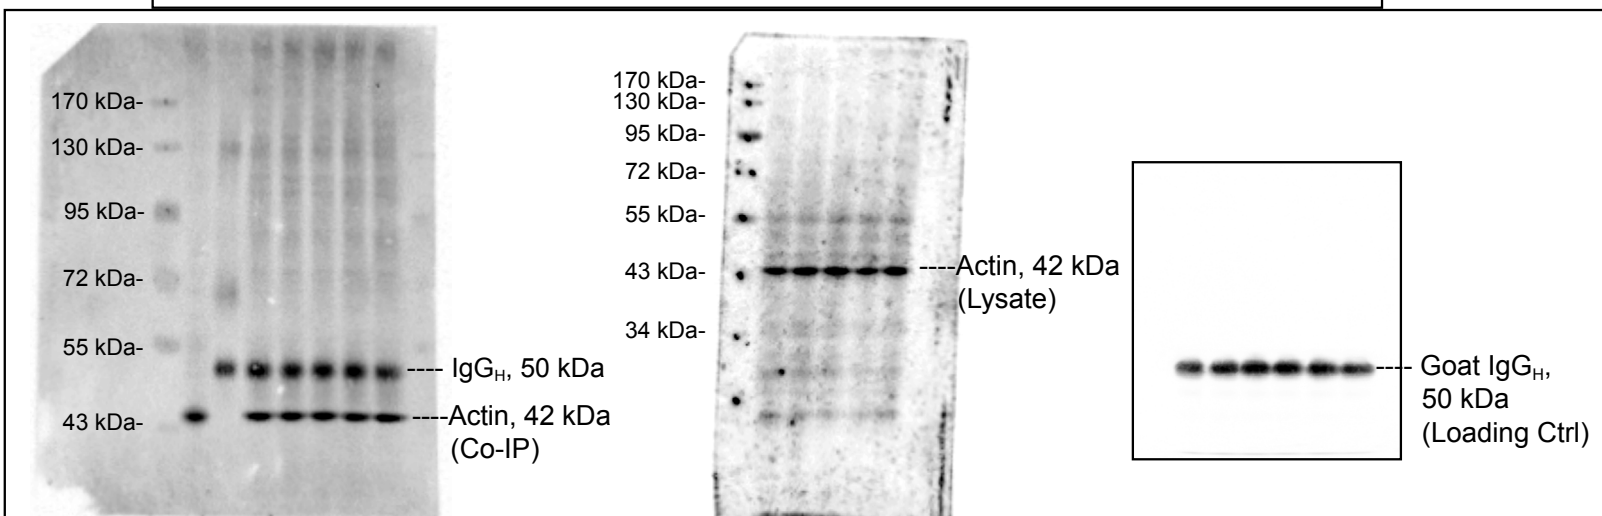

**Figure S5. Uncropped immunoblots of Co-IP experiments.** This figure accompanies Figure 8(a) in the main text, providing additional information to findings shown in Figure 8(a). The % acrylamide (T) used for SDS-PAGE for Eps8, formin 1, Apr3 and actin was 7.5%, 7.5%, 10%, and 7.5% (left panel)/10% (middle panel) T, respectively. The gel that depicted goat IgG<sub>H</sub> (right panel, 4th column) was 10% T gel. T, total acrylamide concentration (grams/100 mL) = acrylamide + methylenebis(acrylamide). Prestained protein markers were obtained from Thermo-Fisher.

Figure S6 (Li et al.)

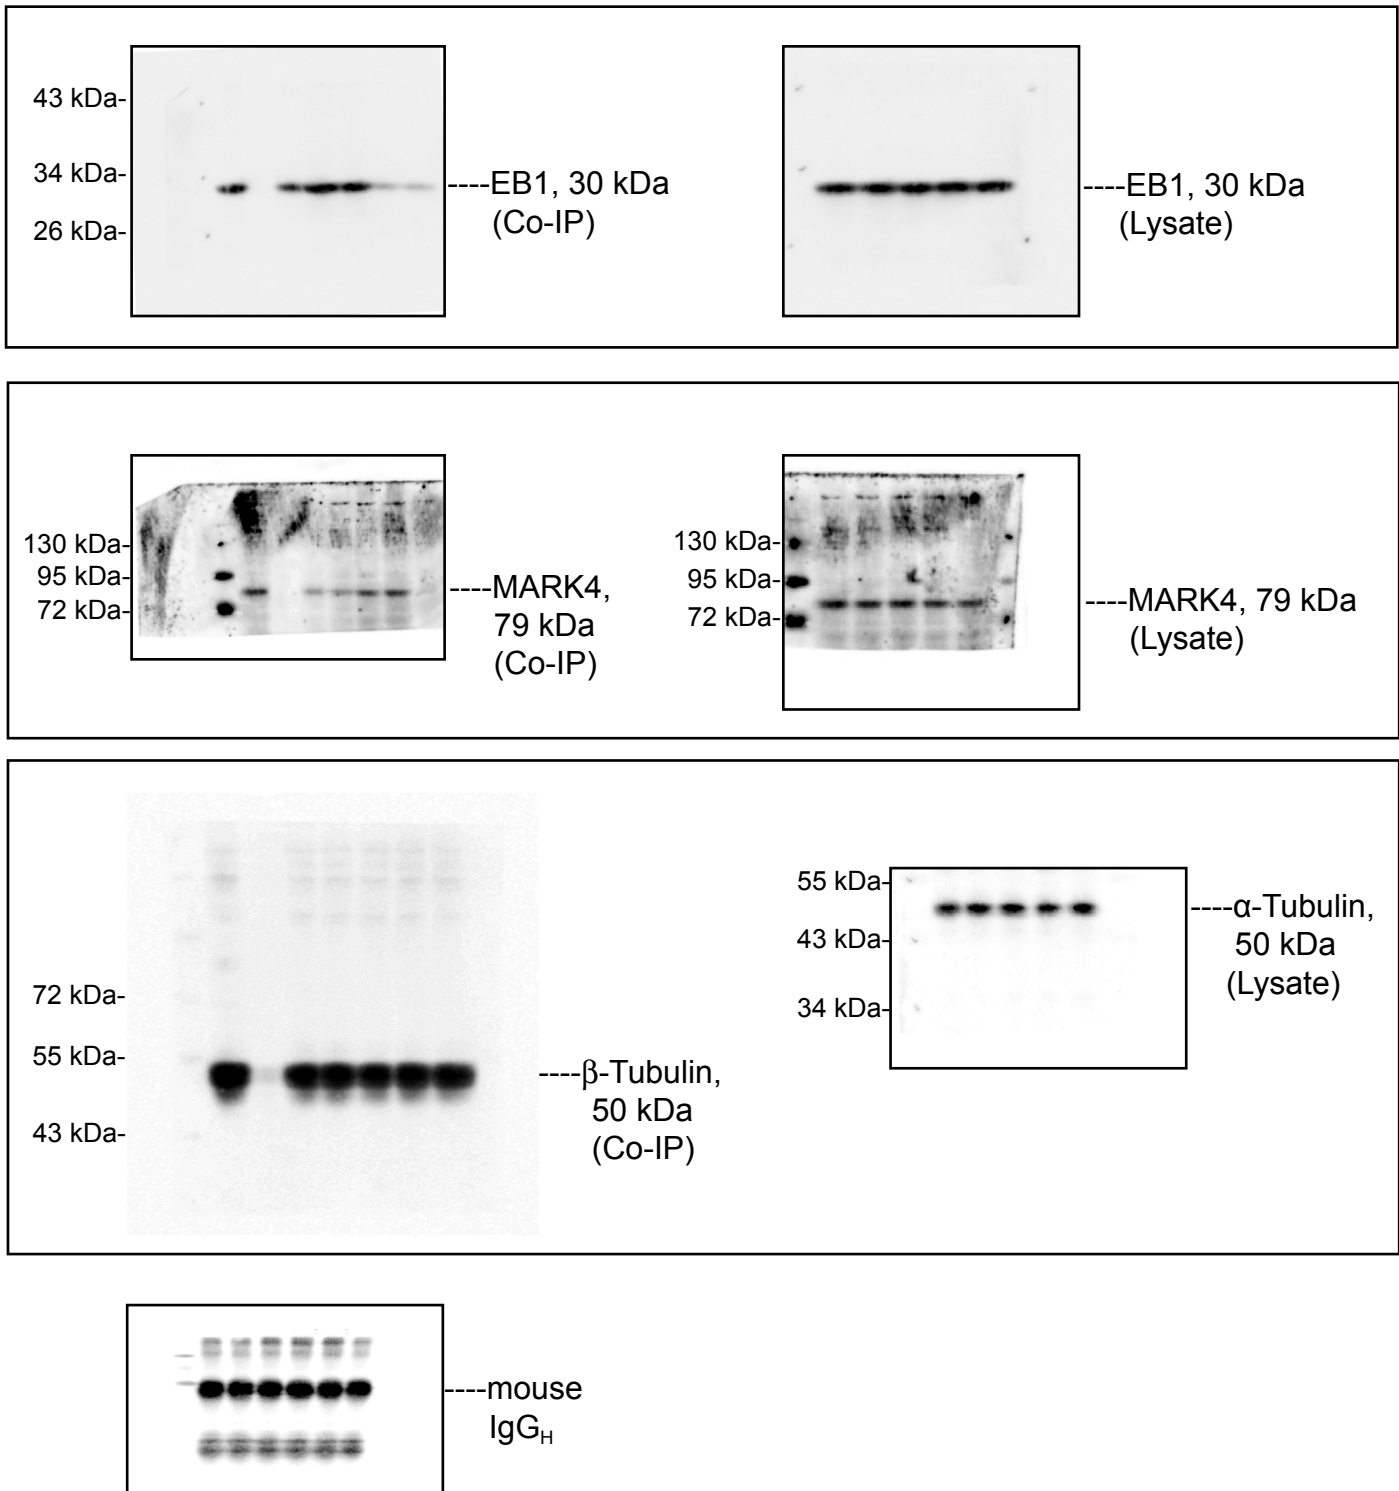

**Figure S6. Uncropped immunoblots of Co-IP experiments.** This figure accompanies Figure 8(b) in the main text, providing additional information to findings shown in Figure 8(b). The % acrylamide (T) used for SDS-PAGE for EB1, MARK4 and tubulin was 12.5%, 10%, and 7.5% (left panel)/10% (right panel) T, respectively. The gel that depicted mouse Ig<sub>H</sub> was 10% T gel. T, total acrylamide concentration (grams/100 mL) = acrylamide + methylenebis(acrylamide). Prestained protein markers were obtained from Thermo-Fisher.
